# Supplementary material
Source: PubMed Central journal article supplement (PMC4771185)
Supplement: NIHMS588003-supplement-01.pdf [file NIHMS588003-supplement-01.pdf]

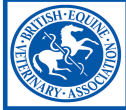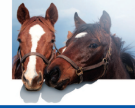

## Supplementary Item 1: Differentially expressed genes at the DEV vs. CON time.

| Gene Name                                                                           | Gene ID   | Fold Change | p-value |
|-------------------------------------------------------------------------------------|-----------|-------------|---------|
| filamin A interacting protein 1-like; GIP130a, GIP90                                | FILIP1L   | -2.36       | 0.0001  |
| MAS-related GPR, member F; Gprotien couple receptor RTA                             | MRGPRF    | <-100       | 0.0003  |
| general transcription factor IIA, 1-like                                            | GTF2A1L   | >100        | 0.0053  |
| protein kinase, AMP-activated, alpha 2 catalytic subunit                            | PRKAA2    | -4.09       | 0.0061  |
| synaptojanin 2 binding protein; activin receptor interacting protein 5              | SYNJ2BP   | <-100       | 0.0069  |
| chromogranin A (parathyroid secretory protein 1)                                    | CHGA      | <-100       | 0.0078  |
| amiloride-sensitive cation channel 1, neuronal (degenerin)                          | ACCN1     | >100        | 0.0080  |
| cytochrome P450 2C92                                                                | CYP2C92   | >100        | 0.0129  |
| selenoprotein X 1                                                                   | SEPX1     | 2.48        | 0.0129  |
| aryl hydrocarbon receptor interacting protein                                       | AIP       | -4.34       | 0.0133  |
| lumican; keratan sulfate proteoglycan lumican                                       | LUM       | -2.32       | 0.0138  |
| histamine receptor H4                                                               | HRH4      | >100        | 0.0138  |
| cytochrome P450, family 19, subfamily A, polypeptide 1                              | CYP19A1   | <-100       | 0.0143  |
| pancreatic lipase                                                                   | PNLIP     | >100        | 0.0153  |
| serpin peptidase inhibitor, clade B (ovalbumin), member 10                          | SERPINB10 | 2.19        | 0.0158  |
| opsin 1 (cone pigments), long-wave-sensitive                                        | OPN1LW    | >100        | 0.0161  |
| hyaluronan and proteoglycan link protein 1                                          | HAPLN1    | <-100       | 0.0162  |
| lipopolysaccharide-induced TNF factor                                               | LITAF     | 2.15        | 0.0210  |
| ADAM metallopeptidase with thrombospondin type 1 motif, 4                           | ADAMTS4   | >100        | 0.0217  |
| serotonin transporter; solute carrier family 6 member 4                             | 5HTT      | -3.37       | 0.0219  |
| 5-hydroxytryptamine (serotonin) receptor 4, G protein-coupled                       | HTR4      | >100        | 0.0229  |
| CD1E1 CD1e1 molecule                                                                | CD1E1     | <-100       | 0.0238  |
| tryptophan hydroxylase 2                                                            | TPH2      | <-100       | 0.0242  |
| transient receptor potential cation channel, subfamily V, member 5                  | TRPV5     | <-100       | 0.0249  |
| solute carrier family 4, anion exchanger, member 1                                  | SLC4A1    | >100        | 0.0250  |
| calcium-sensing receptor; parathyroid cell calcium-sensing receptor                 | CASR      | >100        | 0.0262  |
| solute carrier family 11 (proton-coupled divalent metal ion transporters), member 1 | SLC11A1   | <-100       | 0.0281  |
| nuclear receptor subfamily 5, group A, member 1                                     | NR5A1     | >100        | 0.0294  |
| solute carrier family 5 (inositol transporters), member 3                           | SLC5A3    | <-100       | 0.0320  |
| caspase 3, apoptosis-related cysteine peptidase                                     | CASP3     | 2.18        | 0.0355  |

|                                                             |        |       |        |
|-------------------------------------------------------------|--------|-------|--------|
| aryl hydrocarbon receptor nuclear translocator-like         | ARNTL  | >100  | 0.0356 |
| estrogen receptor 1                                         | ESR1   | >100  | 0.0357 |
| matrix metalloproteinase 1 (interstitial collagenase)       | MMP1   | <-100 | 0.0381 |
| killer cell lectin-like receptor                            | LY49C  | <-100 | 0.0390 |
| Fc fragment of IgE, low affinity II, receptor for (CD23)    | FCER2  | >100  | 0.0419 |
| endothelin receptor type A                                  | EDNRA  | <-100 | 0.0420 |
| IFND1 interferon delta 1                                    | IFND1  | >100  | 0.0423 |
| <b>CD1c</b> molecule; T-cell surface glycoprotein CD1c      | CD1C   | >100  | 0.0466 |
| crystallin, alpha A                                         | CRYAA  | <-100 | 0.0467 |
| defensin, alpha, 17; Paneth cell-specific alpha-defensin 17 | DEFA17 | >100  | 0.0495 |

*\*\* Large fold change (Fc) values (either negative or positive) were obtained for some genes due to the fact that the value 0.001 was used in place of 0 for samples in which expression was undetectable via RNA Seq to allow for mathematical analysis of the results; >100 (for increases in Fc) or <-100 (for decreases in Fc) are used for genes in which this was performed.*
