# Supplementary material
Source: PubMed Central journal article supplement (PMC4771185)
Supplement: NIHMS588003-supplement-Supp_Item_S2.pdf [file NIHMS588003-supplement-Supp_Item_S2.pdf]

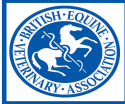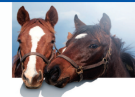

## Supplementary Item 2: Differentially expressed genes at the OG1 vs. CON time.

| Gene Name                                                          | Gene ID | Fold Change | p-value |
|--------------------------------------------------------------------|---------|-------------|---------|
| syndecan binding protein (syntenin)                                | SDCBP   | 3.65        | 0.00001 |
| biglycan; bone/cartilage proteoglycan I                            | BGN     | -3.36       | 0.00008 |
| dual specificity phosphatase and pro isomerase domain containing 1 | DUPD1   | >100        | 0.00010 |
| heat shock 70kDa protein 8                                         | HSPA8   | 3.67        | 0.00012 |
| interleukin 4 receptor                                             | IL4R    | 2.05        | 0.00013 |
| tyrosinase-related protein 1                                       | TYRP1   | <-100       | 0.00019 |
| vimentin                                                           | VIM     | -2.46       | 0.00023 |
| filamin A interacting protein 1-like; GIP130                       | FILIP1L | -2.04       | 0.00047 |
| solute carrier family 26 (sulfate transporter), member 2           | SLC26A2 | 2.54        | 0.00061 |
| glucose-regulated protein                                          | GRP94   | 2.50        | 0.00063 |
| prostaglandin-endoperoxide synthase 1; COX-1                       | PTGS1   | -6.35       | 0.00068 |
| ubiquitin-conjugating enzyme E2D 1                                 | UBE2D1  | >100        | 0.00089 |
| selenoprotein S                                                    | SELS    | 2.04        | 0.00111 |
| S100 calcium binding protein A6; calyculin                         | S100A6  | 2.50        | 0.00112 |
| secreted protein, acidic, cysteine-rich (osteonectin)              | SPARC   | -2.38       | 0.00119 |
| hemoglobin alpha chain complex                                     | HBA     | <-100       | 0.00123 |
| mesencephalic astrocyte-derived neurotrophic factor                | MANF    | 2.33        | 0.00177 |
| gelsolin; actin-depolymerizing factor                              | GSN     | -3.07       | 0.00179 |
| ephrin B2; EPH-related receptor tyrosine kinase ligand             | EFNB2   | -3.31       | 0.00193 |
| RAS protein activator like 2                                       | RASAL2  | -2.24       | 0.00204 |
| thrombospondin 2                                                   | THBS2   | -2.98       | 0.00217 |
| prostaglandin E synthase                                           | PTGES   | 3.94        | 0.00244 |
| phosphodiesterase 4D, cAMP-specific                                | PDE4D   | -6.88       | 0.00266 |
| cytochrome c, somatic                                              | CYCS    | 3.27        | 0.00339 |
| toll-like receptor 2                                               | TLR2    | 4.80        | 0.00360 |
| fasciculation and elongation protein zeta 1 (zygin I)              | FEZ1    | -6.12       | 0.00390 |
| beta-defensin-1                                                    | BD-1    | 35.73       | 0.00417 |
| Yip1 interacting factor homolog A                                  | YIF1A   | 2.58        | 0.00440 |
| phosphoribosyl pyrophosphate amidotransferase                      | PPAT    | 2.59        | 0.00469 |
| fibromodulin; keratan sulfate proteoglycan fibromodulin            | FMOD    | -2.80       | 0.00519 |

|                                                             |            |       |         |
|-------------------------------------------------------------|------------|-------|---------|
| potassium voltage-gated channel, subfamily H, member 2      | KCNH2      | <-100 | 0.00550 |
| prostaglandin F receptor (FP)                               | PTGFR      | >100  | 0.00564 |
| suppressor of cytokine signaling 3                          | SOCS3      | >100  | 0.00598 |
| dopamine beta-hydroxylase                                   | DBH        | <-100 | 0.00620 |
| serine/arginine-rich splicing factor 5                      | SRSF5      | -5.19 | 0.00638 |
| selenoprotein X 1                                           | SEPX1      | 5.38  | 0.00645 |
| cortistatin                                                 | CORT       | <-100 | 0.00662 |
| C1q and tumor necrosis factor related protein 7             | C1QTNF7    | <-100 | 0.00677 |
| hydroxyprostaglandin dehydrogenase 15-(NAD)                 | HPGD       | <-100 | 0.00704 |
| MAS-related GPR, member F; G protein-coupled receptor RTA   | MRGPRF     | <-100 | 0.00716 |
| decorin                                                     | DCN        | -3.89 | 0.00788 |
| GM2 ganglioside activator                                   | GM2A       | -2.94 | 0.00893 |
| matrix metalloproteinase 3 (stromelysin 1, progelatinase)   | MMP3       | >100  | 0.00899 |
| aryl hydrocarbon receptor interacting protein               | AIP        | 2.11  | 0.00959 |
| family with sequence similarity 96, member A                | FAM96A     | >100  | 0.00992 |
| transferrin receptor (p90, CD71)                            | TFRC       | 11.02 | 0.01031 |
| selenoprotein P, plasma, 1                                  | SEPP1      | -3.33 | 0.01077 |
| superoxide dismutase 2, mitochondrial                       | SOD2       | 46.16 | 0.01138 |
| peptidyl arginine deiminase, type II                        | PADI2      | -7.68 | 0.01249 |
| non-metastatic cells 1, protein                             | NME1       | 5.49  | 0.01348 |
| integrin, beta 3 (platelet glycoprotein IIIa, antigen CD61) | ITGB3      | 2.26  | 0.01434 |
| scleraxis                                                   | SCX        | <-100 | 0.01447 |
| chemokine (C-X-C motif) ligand 2; MIP-2a; GRO-2             | CXCL2_dup1 | >100  | 0.01543 |
| calcitonin-related polypeptide alpha                        | CALCA      | <-100 | 0.01806 |
| kit oncogene                                                | KIT        | <-100 | 0.01811 |
| tripartite motif containing 34                              | TRIM34     | >100  | 0.01844 |
| N-myc (and STAT) interactor                                 | NMI        | >100  | 0.01883 |
| interleukin 1 receptor antagonist                           | IL1RN      | 5.69  | 0.01946 |
| phospholipase A2, group IVA (cytosolic, calcium-dependent)  | PLA2G4A    | >100  | 0.01957 |
| chemokine (C-C motif) ligand 2; MCP-1                       | CCL2       | >100  | 0.01962 |
| thioredoxin reductase 1                                     | TXNRD1     | 2.88  | 0.02002 |
| caspase 1; ICE; IL-1 beta-converting enzyme                 | CASP1      | >100  | 0.02133 |
| PC4 and SFRS1 interacting protein 1                         | PSIP1      | -3.52 | 0.02209 |
| deafness, autosomal dominant 5                              | DFNA5      | <-100 | 0.02283 |
| chemokine (C-C motif) receptor 2; MCP-1 receptor            | CCR2       | <-100 | 0.02309 |
| interleukin 12b; IL-12 p40                                  | IL12B      | >100  | 0.02400 |

|                                                                  |             |       |         |
|------------------------------------------------------------------|-------------|-------|---------|
| glial fibrillary acidic protein                                  | GFAP        | 2.57  | 0.02555 |
| toll-like receptor 4                                             | TLR4        | 4.17  | 0.02567 |
| tumor necrosis factor (ligand) superfamily, member 12            | TNFSF12     | -3.79 | 0.02628 |
| chemokine (C-X-C motif) ligand 6                                 | CXCL6       | >100  | 0.02632 |
| tryptophan hydroxylase 2                                         | TPH2        | <-100 | 0.02729 |
| aryl hydrocarbon receptor nuclear translocator-like              | ARNTL       | >100  | 0.02736 |
| ADAM metallopeptidase with thrombospondin type 1 motif, 4        | ADAMTS4     | >100  | 0.02755 |
| melanocortin 1 receptor                                          | MC1R        | >100  | 0.02796 |
| matrix metallopeptidase 13 (collagenase 3)                       | MMP13       | >100  | 0.02830 |
| ISG12 protein-like; interferon, alpha-inducible protein 27       | ISG12(A)    | -2.19 | 0.02866 |
| hexokinase 2                                                     | HK2         | 2.82  | 0.02917 |
| solute carrier family 5 (sodium/glucose cotransporter), member 1 | SLC5A1      | 2.42  | 0.02926 |
| selectin E                                                       | SELE        | >100  | 0.02935 |
| steroidogenic acute regulatory protein                           | STAR        | <-100 | 0.02972 |
| tumor necrosis factor receptor superfamily, member 13            | TNFRSF13C   | <-100 | 0.03033 |
| secretory Phospholipase A2                                       | SPLA2       | <-100 | 0.03126 |
| COX-2; prostaglandin-endoperoxide synthase 2                     | PTGS2       | 9.27  | 0.03191 |
| peripheral myelin protein 22                                     | PMP22       | 5.77  | 0.03342 |
| phosphofructokinase, muscle                                      | PFKM        | -2.23 | 0.03361 |
| phosphorylase, glycogen, muscle                                  | PYGM        | <-100 | 0.03376 |
| collagen, type XIV, alpha 1                                      | COL14A1     | -2.02 | 0.03420 |
| chemokine (C-C motif) ligand 8; MCP-2                            | CCL8        | >100  | 0.03455 |
| COX10 homolog, cytochrome c oxidase assembly protein             | COX10       | 3.06  | 0.03477 |
| 5-hydroxytryptamine (serotonin) receptor 2A, G protein-coupled   | HTR2A       | >100  | 0.03496 |
| regulator of chromosome condensation 1                           | RCC1        | 2.15  | 0.03692 |
| C25H9orf100 chromosome 9 open reading frame 100 ortholog         | C25H9orf100 | <-100 | 0.03894 |
| serum amyloid A1                                                 | SAA1        | 68.00 | 0.03895 |
| chemokine (C-C motif) ligand 13; MCP-4                           | CCL13       | >100  | 0.03948 |
| sphingosine-1-phosphate receptor 1                               | S1PR1       | >100  | 0.03998 |
| antimicrobial peptide NK-lysin                                   | NKL         | <-100 | 0.04002 |
| DEFA35L Paneth cell-specific alpha-defensin 35L                  | DEFA35L     | >100  | 0.04219 |
| CD2 molecule; LFA-3 receptor                                     | CD2         | <-100 | 0.04231 |
| H19 fetal liver mRNA                                             | H19         | <-100 | 0.04253 |
| fin bud initiation factor homolog                                | FIBIN       | <-100 | 0.04282 |

|                                                          |             |       |         |
|----------------------------------------------------------|-------------|-------|---------|
| TIMP metalloproteinase inhibitor 1                       | TIMP1       | 5.01  | 0.04343 |
| erythropoietin                                           | EPO         | <-100 | 0.04563 |
| CD1a6 molecule                                           | CD1A6       | >100  | 0.04640 |
| fibroblast growth factor 1 (acidic)                      | FGF1        | <-100 | 0.04802 |
| TNNI3 interacting kinase                                 | TNNI3K      | <-100 | 0.04824 |
| C13H16orf93 chromosome 16 open reading frame 93 ortholog | C13H16orf93 | <-100 | 0.04832 |
| bone morphogenetic protein 7                             | BMP7        | -2.78 | 0.04850 |

*\*\* Large fold change (Fc) values (either negative or positive) were obtained for some genes due to the fact that the value 0.001 was used in place of 0 for samples in which expression was undetectable via RNA Seq to allow for mathematical analysis of the results; >100 (for increases in Fc) or <-100 (for decreases in Fc) are used for genes in which this was performed.*
