# Supplementary material
Source: PubMed Central journal article supplement (PMC4771185)
Supplement: NIHMS588003-supplement-Supp_Item_S3.pdf [file NIHMS588003-supplement-Supp_Item_S3.pdf]

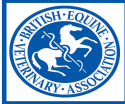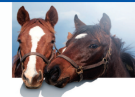

### Supplementary Item 3: Differentially expressed genes at the OG1 vs. DEV time.

| Gene Name                                                | Gene ID | Fold Change | p-value |
|----------------------------------------------------------|---------|-------------|---------|
| inducible nitric oxide synthase                          | INOS    | <-100       | 0.0001  |
| heat shock 70kDa protein 8                               | HSPA8   | 6.27        | 0.0002  |
| gelsolin; actin-depolymerizing factor; brevin            | GSN     | -4.17       | 0.0002  |
| tumor protein p53                                        | TP53    | 2.03        | 0.0005  |
| cytochrome c, somatic                                    | CYCS    | 2.21        | 0.0006  |
| scleraxis                                                | SCX     | <-100       | 0.0006  |
| Yip1 interacting factor homolog A                        | YIF1A   | 4.18        | 0.0006  |
| secreted protein, acidic, cysteine-rich (osteonectin)    | SPARC   | -2.24       | 0.0007  |
| aryl hydrocarbon receptor interacting protein            | AIP     | 7.98        | 0.0010  |
| isocitrate dehydrogenase 1 (NADP+), soluble              | IDH1    | -2.23       | 0.0011  |
| serine/arginine-rich splicing factor 5                   | SRSF5   | -6.20       | 0.0011  |
| glucose-regulated protein                                | GRP94   | 2.77        | 0.0014  |
| matrix metalloproteinase 1 (interstitial collagenase)    | MMP1    | >100        | 0.0019  |
| pleckstrin homology domain containing, family A          | PLEKHA8 | >100        | 0.0022  |
| prostaglandin E synthase                                 | PTGES   | 3.96        | 0.0029  |
| bone morphogenetic protein 7                             | BMP7    | -3.19       | 0.0029  |
| selenoprotein I                                          | SELI    | 2.18        | 0.0037  |
| serine/arginine-rich splicing factor 7                   | SRSF7   | 4.47        | 0.0038  |
| toll-like receptor 2                                     | TLR2    | 6.54        | 0.0039  |
| TNNI3 interacting kinase                                 | TNNI3K  | <-100       | 0.0041  |
| prostaglandin F receptor (FP)                            | PTGFR   | 4.93        | 0.0043  |
| mesencephalic astrocyte-derived neurotrophic factor      | MANF    | 2.11        | 0.0052  |
| beta-defensin-1                                          | BD-1    | 48.00       | 0.0064  |
| cortistatin                                              | CORT    | >100        | 0.0065  |
| COX10 homolog, cytochrome c oxidase assembly protein     | COX10   | 3.04        | 0.0067  |
| syndecan binding protein (syntenin)                      | SDCBP   | 2.53        | 0.0072  |
| thioredoxin reductase 1                                  | TXNRD1  | >100        | 0.0072  |
| cadherin 11                                              | CDH11   | >100        | 0.0076  |
| prostaglandin-endoperoxide synthase 1; COX-1             | PTGS1   | -4.16       | 0.0090  |
| synaptojanin 2 binding protein                           | SYNJ2BP | >100        | 0.0092  |
| thrombospondin 2                                         | THBS2   | -2.34       | 0.0094  |
| protein kinase, AMP-activated, alpha 1 catalytic subunit | PRKAA1  | 2.65        | 0.0097  |
| N-myc (and STAT) interactor                              | NMI     | >100        | 0.0105  |
| hydroxyprostaglandin dehydrogenase 15-(NAD)              | HPGD    | <-100       | 0.0109  |

|                                                                                  |            |       |        |
|----------------------------------------------------------------------------------|------------|-------|--------|
| S100 calcium binding protein A6                                                  | S100A6     | 2.01  | 0.0111 |
| C1q and tumor necrosis factor related protein 7                                  | C1QTNF7    | <-100 | 0.0111 |
| matrix metalloproteinase 3 (stromelysin 1, progelatinase)                        | MMP3       | >100  | 0.0116 |
| CD2 molecule; T-cell surface antigen CD2                                         | CD2        | <-100 | 0.0124 |
| nuclear receptor subfamily 5, group A, member 1; steroidogenic factor-1          | NR5A1      | <-100 | 0.0126 |
| caspase 1; interleukin 1 beta-converting enzyme; ICE-1                           | CASP1      | >100  | 0.0129 |
| interleukin 1 receptor antagonist                                                | IL1R1      | 2.16  | 0.0129 |
| tyrosinase-related protein 1                                                     | TYRP1      | <-100 | 0.0156 |
| GM2 ganglioside activator                                                        | GM2A       | -2.90 | 0.0162 |
| interleukin 1 receptor antagonist                                                | IL1RN      | >100  | 0.0167 |
| ADP-ribosylation factor 4                                                        | ARF2       | >100  | 0.0174 |
| biglycan; bone/cartilage proteoglycan I                                          | BGN        | -3.15 | 0.0175 |
| colony stimulating factor 3 (granulocyte)                                        | CSF3       | <-100 | 0.0176 |
| integrin, beta 3 (platelet glycoprotein IIIa, antigen CD61)                      | ITGB3      | 7.30  | 0.0200 |
| lipopolysaccharide-induced TNF factor                                            | LITAF      | -3.64 | 0.0202 |
| integrin, alpha 2b (platelet glycoprotein IIb of IIb/IIIa complex, antigen CD41) | ITGA2B     | -4.02 | 0.0203 |
| superoxide dismutase 2, mitochondrial                                            | SOD2       | 32.04 | 0.0205 |
| vitamin D (1,25- dihydroxyvitamin D3) receptor                                   | VDR        | 2.89  | 0.0210 |
| solute carrier family 2 (facilitated glucose transporter), member 1; GLUT1       | SLC2A1     | -2.24 | 0.0211 |
| selenoprotein P, plasma, 1                                                       | SEPP1      | -2.72 | 0.0225 |
| phosphoribosyl pyrophosphate amidotransferase                                    | PPAT       | >100  | 0.0228 |
| solute carrier family 5 (inositol transporters), member 3                        | SLC5A3     | 3.16  | 0.0231 |
| 24-dehydrocholesterol reductase                                                  | DHCR24     | 2.19  | 0.0239 |
| 2'-5'-oligoadenylate synthetase 2, 69/71kDa                                      | OAS2       | >100  | 0.0240 |
| transferrin receptor (p90, CD71)                                                 | TFRC       | 19.32 | 0.0250 |
| striatin, calmodulin binding protein 3                                           | STRN3      | 2.15  | 0.0250 |
| apolipoprotein B mRNA-editing enzyme-catalytic polypeptide-like 3Z1b             | APOBEC3Z1B | <-100 | 0.0250 |
| inhibin, beta A                                                                  | INHBA      | <-100 | 0.0253 |
| fibroblast growth factor 1 (acidic)                                              | FGF1       | <-100 | 0.0266 |
| interleukin 6                                                                    | IL6        | >100  | 0.0277 |
| serine/threonine kinase 31                                                       | STK31      | <-100 | 0.0284 |
| cytochrome p450 3A93                                                             | CYP3A93    | <-100 | 0.0299 |
| CD1c molecule                                                                    | CD1C       | <-100 | 0.0300 |
| beta-2 microglobulin                                                             | B2M        | 2.01  | 0.0305 |
| endothelin receptor type A                                                       | EDNRA      | >100  | 0.0309 |
| hydroxy-delta-5-steroid dehydrogenase, 3 beta- and steroid delta-isomerase 1     | HSD3B1     | <-100 | 0.0327 |

|                                                                            |            |       |        |
|----------------------------------------------------------------------------|------------|-------|--------|
| melanocortin 1 receptor (alpha melanocyte stimulating hormone receptor)    | MC1R       | >100  | 0.0329 |
| fasciculation and elongation protein zeta 1 (zygin I)                      | FEZ1       | -4.22 | 0.0344 |
| cytochrome P450 2C92                                                       | CYP2C92    | <-100 | 0.0349 |
| suppressor of cytokine signaling 3                                         | SOCS3      | >100  | 0.0352 |
| chemokine (C-C motif) ligand 13; MCP_4                                     | CCL13      | >100  | 0.0358 |
| matrix metalloproteinase 13 (collagenase 3)                                | MMP13      | 55.41 | 0.0365 |
| amiloride-sensitive cation channel 3                                       | ACCN3      | <-100 | 0.0366 |
| Fc fragment of IgE, low affinity II, receptor for (CD23)                   | FCER2      | <-100 | 0.0373 |
| chemokine (C-X-C motif) ligand 2; MIP-2a                                   | CXCL2_dup1 | >100  | 0.0374 |
| killer cell lectin-like receptor                                           | LY49C      | <-100 | 0.0375 |
| estrogen receptor 1                                                        | ESR1       | <-100 | 0.0377 |
| secretory Phospholipase A2                                                 | SPLA2      | >100  | 0.0386 |
| hemoglobin, alpha 1                                                        | HBA_dup1   | <-100 | 0.0401 |
| toll-like receptor 4                                                       | TLR4       | 5.11  | 0.0402 |
| endothelin 2                                                               | EDN2       | <-100 | 0.0406 |
| TIMP metalloproteinase inhibitor 1                                         | TIMP1      | 7.41  | 0.0409 |
| phosphofructokinase, muscle                                                | PFKM       | -2.59 | 0.0415 |
| CD14 molecule                                                              | CD14       | 5.51  | 0.0417 |
| fibroblast growth factor 2 (basic); heparin-binding growth factor 2        | FGF2       | <-100 | 0.0420 |
| regulator of chromosome condensation 1                                     | RCC1       | 2.25  | 0.0420 |
| non-metastatic cells 1, protein (NM23A)                                    | NME1       | 4.17  | 0.0434 |
| myxovirus (influenza virus) resistance 1, interferon-inducible protein p78 | MX1        | >100  | 0.0437 |
| deafness, autosomal dominant 5                                             | DFNA5      | <-100 | 0.0438 |
| interferon delta 1                                                         | IFND1      | <-100 | 0.0447 |
| transient receptor potential cation channel, subfamily V, member 5         | TRPV5      | >100  | 0.0450 |
| steroid sulfatase (microsomal), isozyme S                                  | STS        | <-100 | 0.0458 |
| inhibin, alpha                                                             | INHHA      | <-100 | 0.0458 |
| solute carrier family 11 , member 1                                        | SLC11A1    | >100  | 0.0461 |
| leptin                                                                     | LEP        | >100  | 0.0462 |
| prostaglandin-endoperoxide synthase 2; COX-2                               | PTGS2      | 9.51  | 0.0463 |
| eukaryotic translation initiation factor 2-alpha kinase 2                  | EIF2AK2    | >100  | 0.0463 |
| chondroadherin-like                                                        | CHADL      | >100  | 0.0486 |
| phosphorylase, glycogen, muscle                                            | PYGM       | <-100 | 0.0494 |
| chemokine (C-C motif) ligand 2; MCP-1                                      | CCL2       | >100  | 0.0495 |

*\*\* Large fold change (Fc) values (either negative or positive) were obtained for some genes due to the fact that the value 0.001 was used in place of 0 for samples in which expression was*

*undetectable via RNA Seq to allow for mathematical analysis of the results; >100 (for increases in Fc) or <-100 (for decreases in Fc) are used for genes in which this was performed.*
